# Supplementary material
Source: publisher figshare collection journal article supplement (https://acs.figshare.com/ndownloader/files/14181599)
Supplement: Supplementary file 1 [file 14181599]

# Supporting Information for: Elucidating Polymorph-selective Bio-adsorption on Chitin Surfaces

Aaron H. Brown and Tiffany R. Walsh\*

*Institute for Frontier Materials, Deakin University, Geelong, Vic. 3216, Australia*

E-mail: tiffany.walsh@deakin.edu.au

## Contents

**Table S1:** Centre of mass distances used for the harmonic potential applied to each umbrella.

**Table S2:** Harmonic restraints locations and force constants used for the amino acid inclusion umbrella sampling simulations.

**Figure S1:** Exemplar umbrella histograms.

**Figure S2:** Baseline used to denote the top of each chitin interface.

**Figure S3:** Schematic of the vector used to determine the orientation of the amino acids at each interface.

**Table S3:** Sites used for the calculation of distance between the interaction site on each amino acid and the chitin surface.

**Table S4:** Adsorption free energy values for the nine representative amino acids for all four aqueous chitin interfaces.

**Figure S4:** Adsorption free energy profiles for nine representative amino acids at the aqueous  $\alpha$ [100] interface.

**Figure S5:** Adsorption free energy profiles for nine representative amino acids at the aqueous  $\beta$ [100] interface.

**Figure S6:** Adsorption free energy profiles for nine representative amino acids at the aqueous  $\alpha$ [010] interface.

**Figure S7:** Adsorption free energy profiles for nine representative amino acids at the aqueous  $\beta$ [010] interface.

**Figure S8:** Free energy profiles for the inclusion of four amino acids into the  $\beta$ -chitin crystal from the aqueous [100] interface.

| Umbrella | Distance (nm) |
|----------|---------------|
| 1        | 3.50          |
| 2        | 3.25          |
| 3        | 3.00          |
| 4        | 2.75          |
| 5        | 2.50          |
| 6        | 2.25          |
| 7        | 2.00          |
| 8        | 1.80          |
| 9        | 1.70          |
| 10       | 1.60          |
| 11       | 1.50          |
| 12       | 1.40          |
| 13       | 1.30          |

**Table S1:** Centre of mass distances used for the harmonic potential applied to each umbrella.

|          | Ala    |      | Asp    |      | Asn    |      | Tyr    |      |
|----------|--------|------|--------|------|--------|------|--------|------|
| Umbrella | centre | $k1$ | centre | $k1$ | centre | $k1$ | centre | $k1$ |
| 1        | -0.465 | 500  | -0.793 | 500  | -0.500 | 500  | -0.540 | 500  |
| 2        | -0.380 | 500  | -0.653 | 500  | -0.391 | 500  | -0.407 | 500  |
| 3        | -0.272 | 500  | -0.495 | 500  | -0.300 | 500  | -0.275 | 500  |
| 4        | -0.143 | 500  | -0.284 | 500  | -0.172 | 500  | -0.262 | 500  |
| 5        | -0.063 | 1000 | -0.266 | 1000 | -0.99  | 500  | -0.192 | 500  |
| 6        | 0.124  | 500  | 0.103  | 500  | 0.078  | 500  | 0.072  | 1000 |
| 7        |        |      | 0.190  | 500  | 0.204  | 500  |        |      |

**Table S2:** Harmonic restraints locations and force constants used for the amino acid inclusion umbrella sampling simulations.

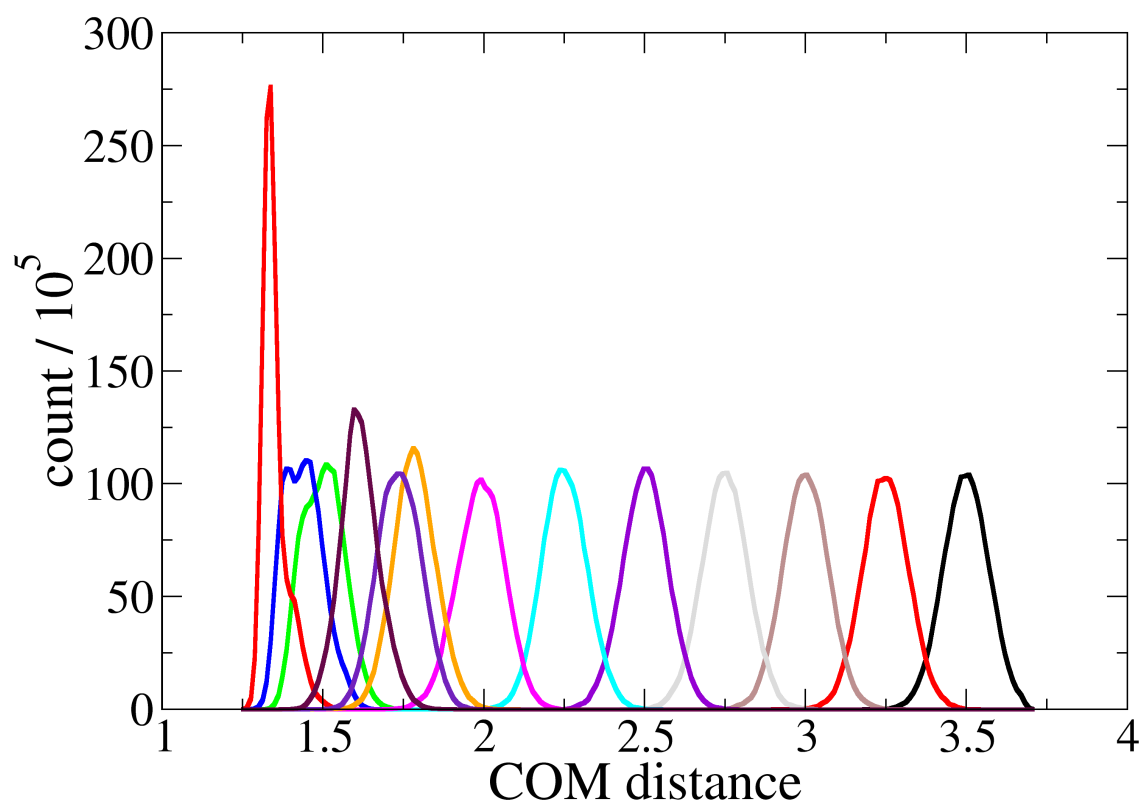

**Figure S1:** Exemplar umbrella histogram, produced from the umbrella simulations of Ala at the aqueous  $\alpha$ -chitin [100] interface.

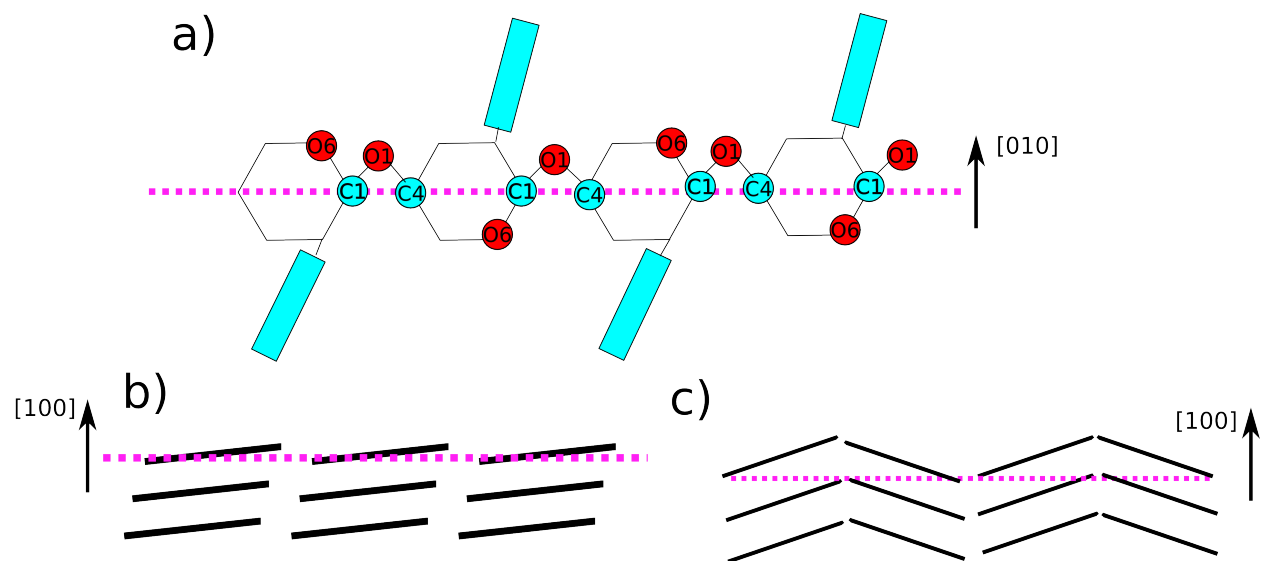

**Figure S2:** Baseline used to denote the top of each chitin interface for a) the aqueous [010] interfaces, b) the  $\beta$ [100] interface and c) the  $\alpha$ [100] interface.

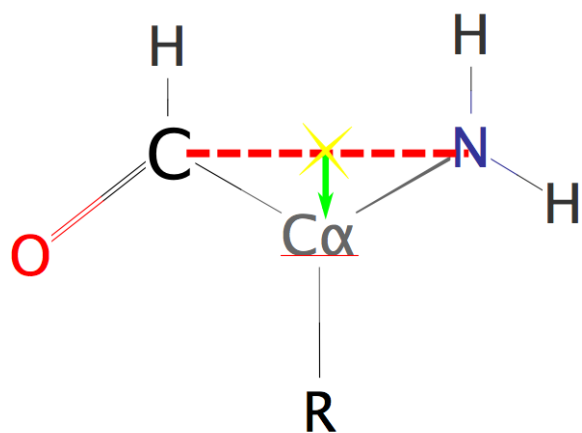

**Figure S3:** Schematic of the vector used to determine the orientation of the amino acids at each interface.

| Residue | Site                     |
|---------|--------------------------|
| Ala     | $C_\beta$                |
| Asp     | $C_\gamma$               |
| Glu     | $C_\delta$               |
| Lys     | $N_Z$                    |
| Arg     | $C_Z$                    |
| Asn     | $N_\delta$               |
| Cys     | SZ                       |
| Tyr     | Geometric Centre of Ring |
| Trp     | Geometric Centre of Ring |

**Table S3:** Sites used for the calculation of distance between the interaction site on each amino acid and the chitin surface.

| Amino Acid | $\alpha[100]$             | $\beta[100]$              | $\alpha[010]$             | $\beta[010]$              |
|------------|---------------------------|---------------------------|---------------------------|---------------------------|
| Ala        | $-0.82 \pm 0.67$          | $-1.61 \pm 0.63$          | $-6.27 \pm 0.96$          | $-1.06 \pm 1.34$          |
| Arg        | $-0.49 \pm 0.92$          | $-\mathbf{4.49 \pm 0.64}$ | $-9.25 \pm 1.31$          | $-0.01 \pm 2.41$          |
| Asn        | $-2.03 \pm 0.63$          | $-0.28 \pm 0.56$          | $-5.39 \pm 1.13$          | $-8.51 \pm 1.48$          |
| Asp        | $-1.30 \pm 0.71$          | $-0.91 \pm 0.66$          | $-1.93 \pm 1.50$          | $-0.60 \pm 1.06$          |
| Cys        | $0.01 \pm 0.59$           | $-2.99 \pm 0.82$          | $-5.30 \pm 0.83$          | $-3.36 \pm 1.40$          |
| Glu        | $-1.11 \pm 0.82$          | $-1.42 \pm 0.55$          | $-2.16 \pm 1.37$          | $1.13 \pm 1.73$           |
| Lys        | $0.48 \pm 0.66$           | $-0.67 \pm 0.81$          | $-5.26 \pm 1.09$          | $-1.74 \pm 1.33$          |
| Trp        | $-\mathbf{2.31 \pm 0.69}$ | $-3.56 \pm 0.87$          | $-\mathbf{9.44 \pm 1.40}$ | $-\mathbf{9.00 \pm 2.32}$ |
| Tyr        | $-0.91 \pm 0.72$          | $-4.07 \pm 0.54$          | $-6.45 \pm 2.60$          | $-3.57 \pm 2.03$          |

**Table S4:** Binding free energy values ( $\text{kJmol}^{-1}$ ) for the nine representative amino acids, for all four aqueous chitin interfaces. The most strongly adsorbing amino acid to each surface is indicated in bold.

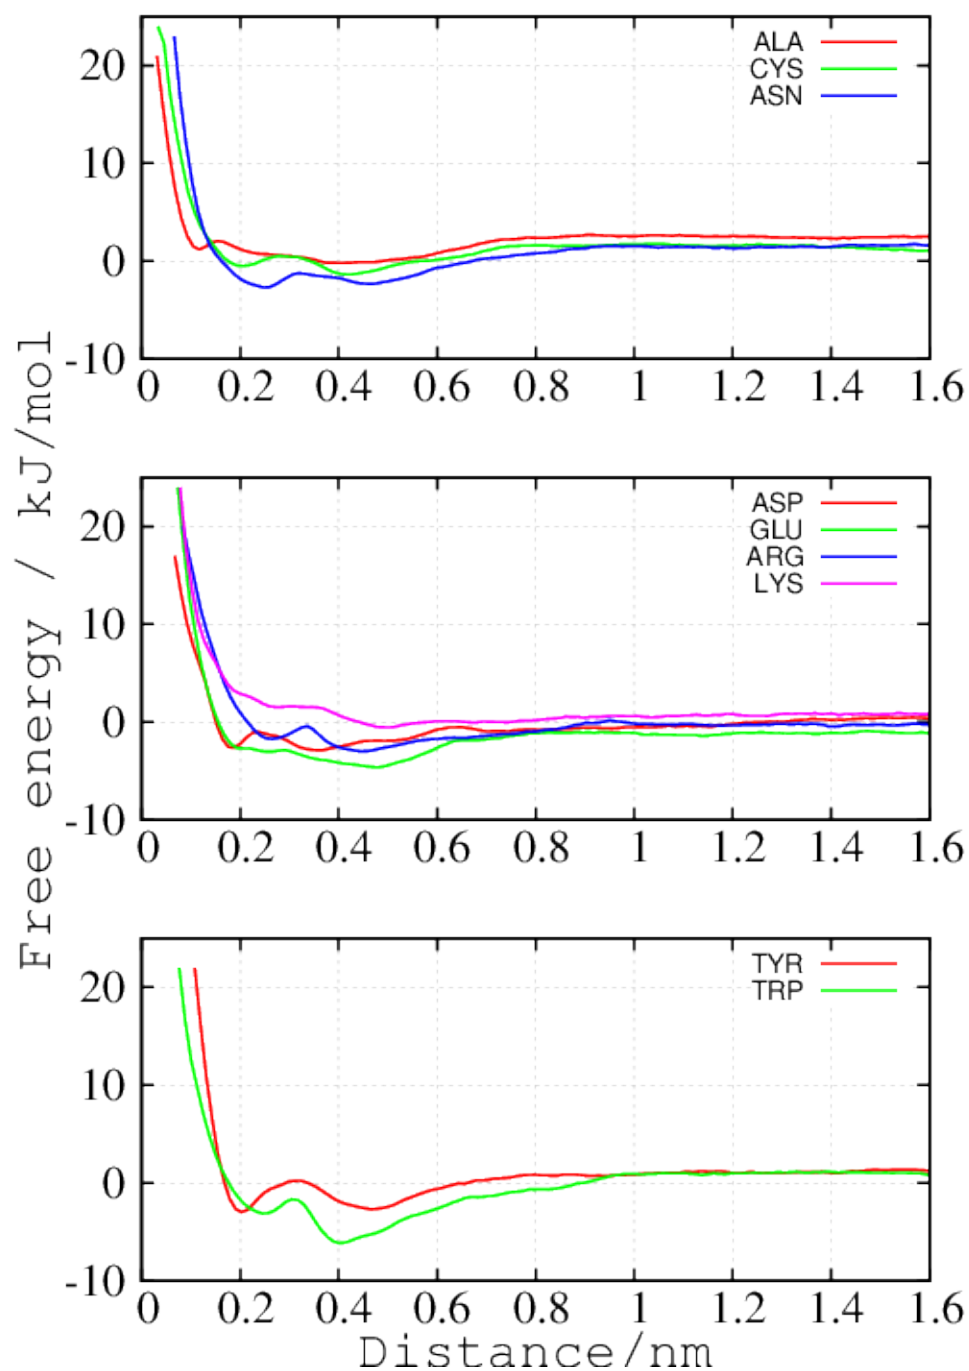

**Figure S4:** Adsorption free energy profiles for nine representative amino acids at the aqueous  $\alpha[100]$  interface.

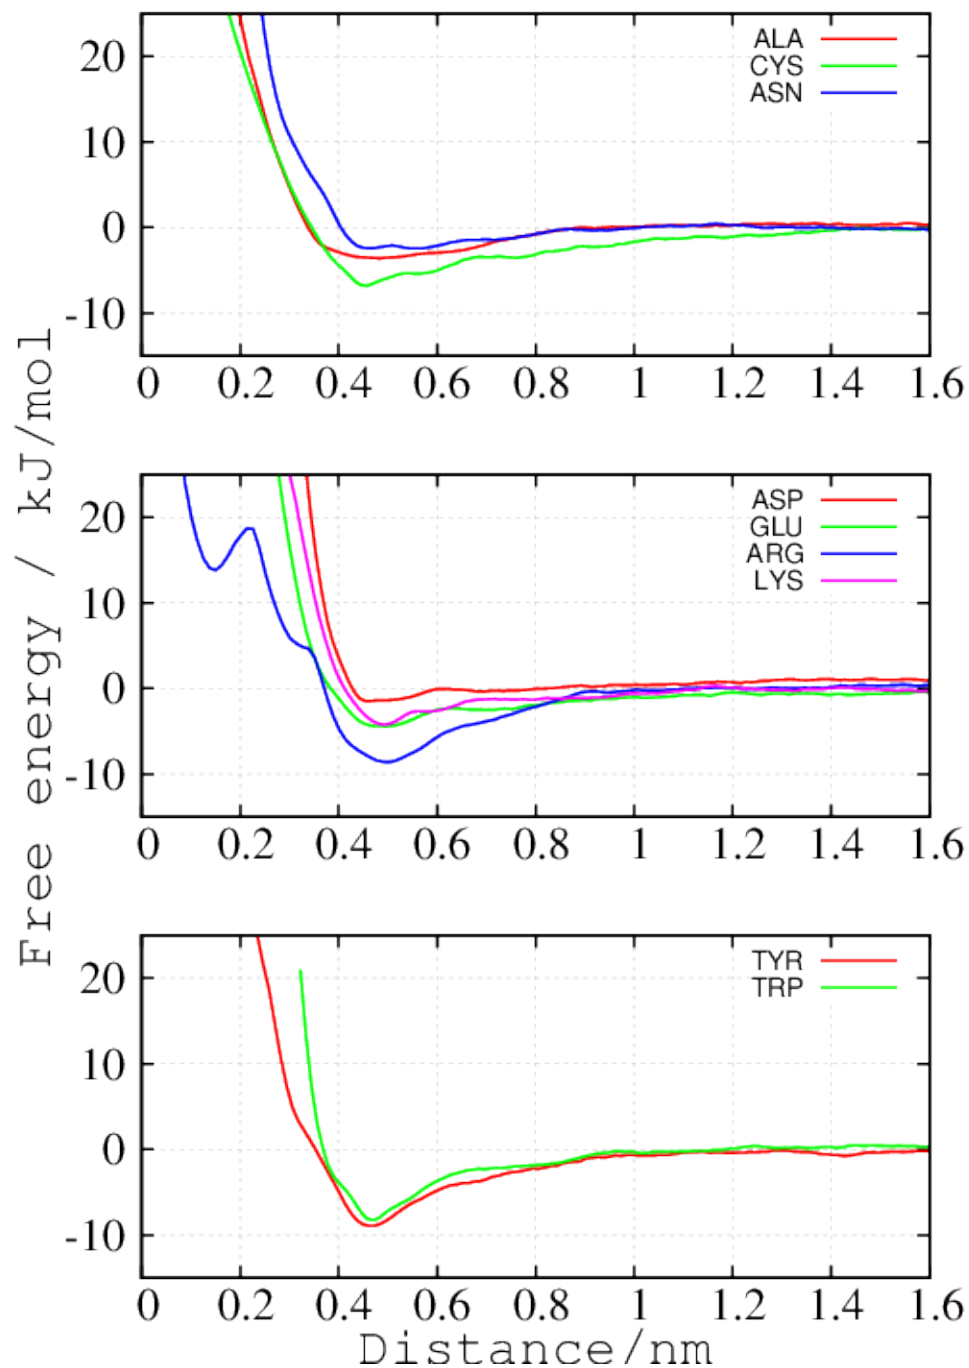

**Figure S5:** Adsorption free energy profiles for nine representative amino acids at the aqueous  $\beta[100]$  interface.

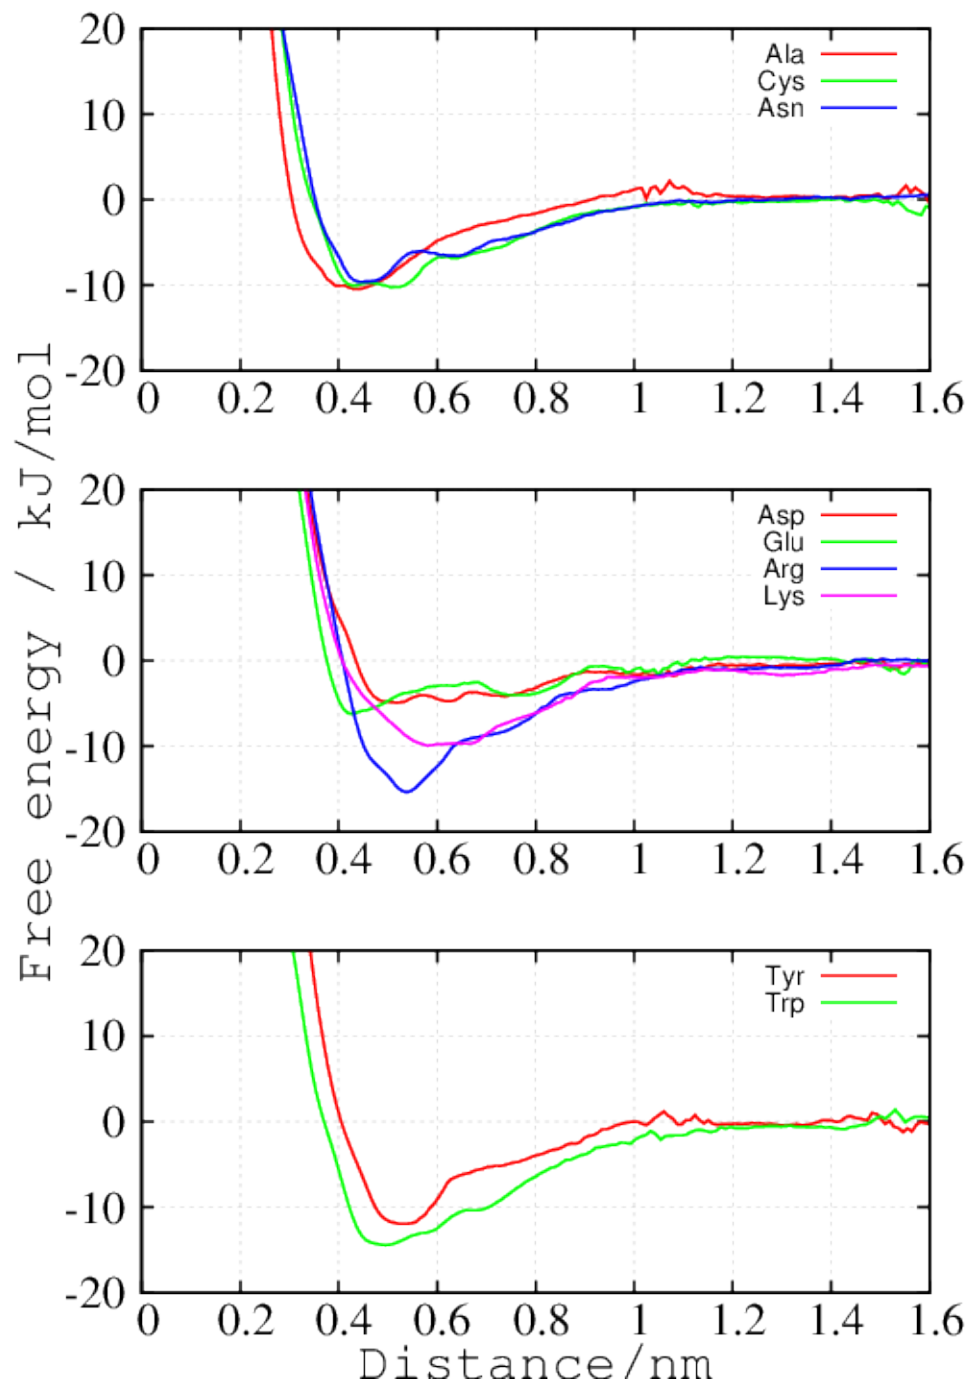

**Figure S6:** Adsorption free energy profiles for nine representative amino acids at the aqueous  $\alpha[010]$  interface.

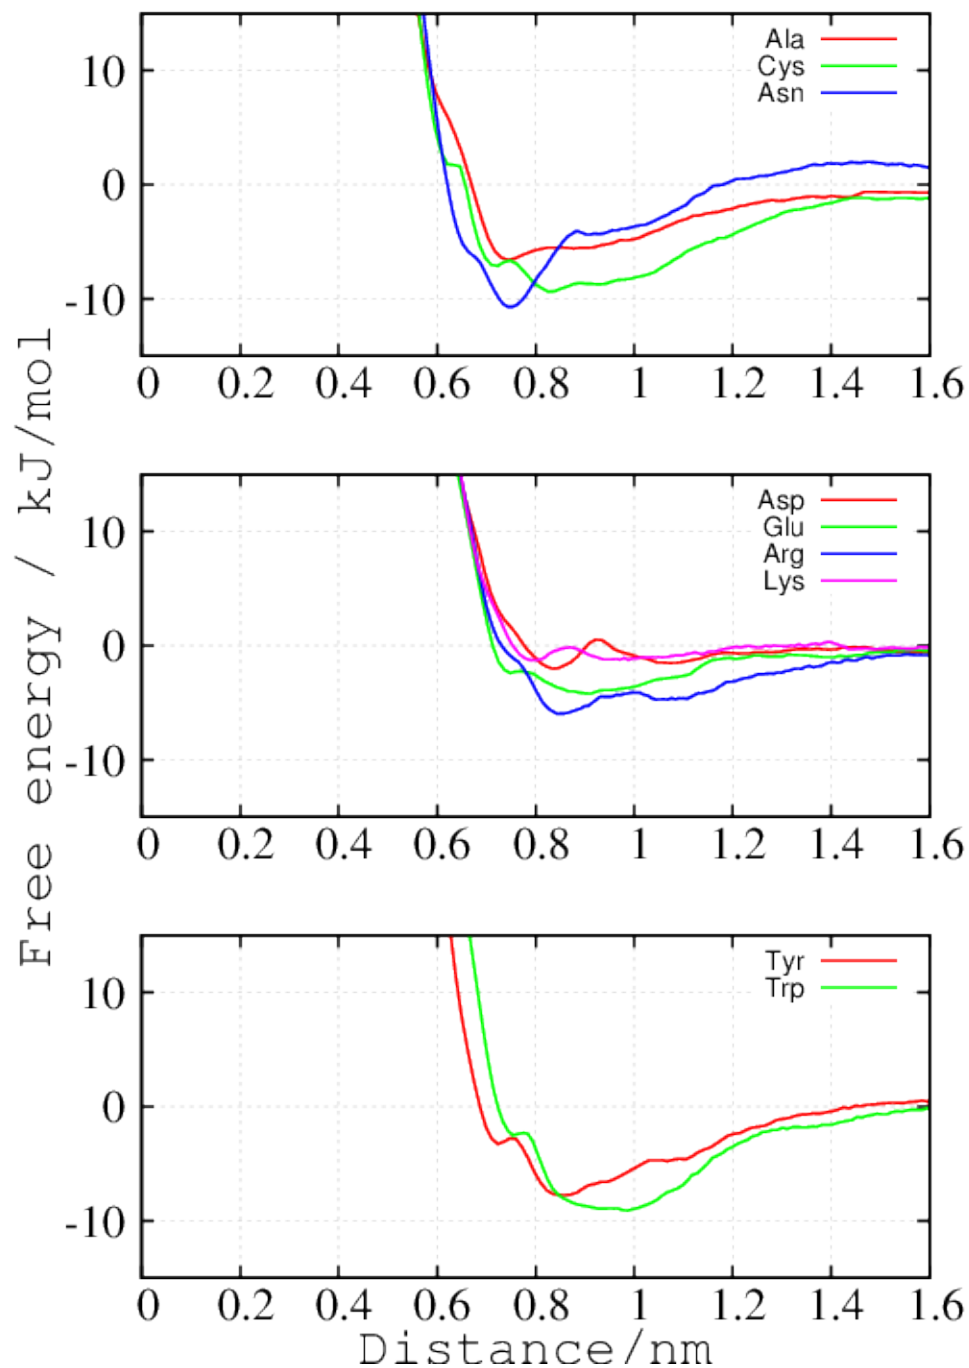

**Figure S7:** Adsorption free energy profiles for nine representative amino acids at the aqueous  $\beta[010]$  interface.

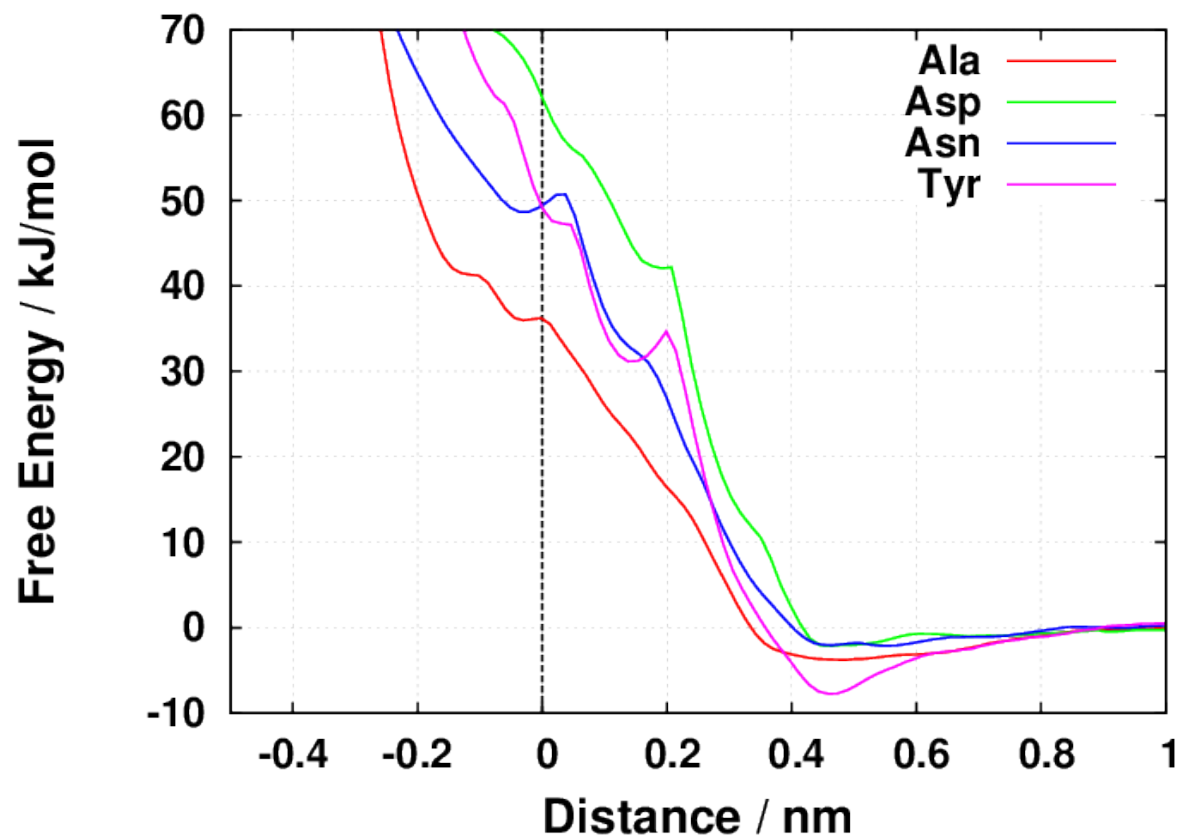

**Figure S8:** Free energy profiles for the inclusion of four amino acids into the  $\beta$ -chitin crystal from the aqueous [100] interface.
